# Supplementary material for: The effect of lining hydraulic properties on the efficiency and cost of irrigation canal reconstruction
Source: Research Square preprint supplement (doi:10.21203/rs.3.rs-3734693/v1), 2023-12-19
Supplement: Supplementary file 1 [file f3ff504df26851a4c8d6e891.docx]

**Statements & Declarations**

**Funding**

*“The authors declare that no funds, grants, or other support were received during the preparation of this manuscript.”*

**Competing Interests**

*“The authors have no relevant financial or non-financial interests to disclose.”*

**Author Contributions**

Authors are encouraged to include a statement that specifies the contribution of every author to the research and preparation of the manuscript.

Example statement:

*“All authors contributed to the study conception and design. Material preparation, data collection and analysis were performed by [full name], [full name] and [full name]. The first draft of the manuscript was written by [full name] and all authors commented on previous versions of the manuscript. All authors read and approved the final manuscript.”*

“Conceptualization, M.E.A, M.A., A.K., H.F.A.; Data curation, M.E.A, M.A., A.K., H.F.A.; Formal analysis, M.A., M.E.A, A.K., H.F.A., M.Z.; Investigation, H.F.A., M.Z.; Methodology, H.F.A., M.E.A, M.A., A.K.; Project administration, H.F.A. and M.Z.; Resources, H.F.A., M.Z., R.R.; Software, M.E.A, M.A., A.K.,; Supervision, A.K., M.Z.; Validation, M.A., M.E.A, A.K, H.F.A.; Visualization, A.K., M.Z.; Writing – original draft, M.E.A, M. A.; Writing – review & editing, M.A., M.E.A, H.F.A., R.R. and M.Z.“

Please refer to the “Authorship Principles ” section below for more information on how to complete this section.
